# Supplementary material for: Photoprotective Bioactivity Present in a Unique Marine Bacteria Collection from Portuguese Deep Sea Hydrothermal Vents
Source: MDPI journal article supplement (doi:10.3390/md11051506), 2013-05-10
Supplement: s1 [file s1]

## Supplemental Information

**Table S1.** Characteristics of the samples collected at MAR vents. The samples were characterized based on the vent, type of sample, collecting equipment, depth and temperature from where they were collected.

| Reference | Code  | Vent           | Type of sample                                    | Collecting equipment | Depth (m) | T (°C)  |
|-----------|-------|----------------|---------------------------------------------------|----------------------|-----------|---------|
| MG1       | MG WA | Menez Gwen     | Water                                             | Insulated box        | 825       | 8.4     |
| MG2       | MG BA |                | <i>Bathymordiolum azoricum</i>                    | Insulated box        | 825       | 8.4     |
| MG3       | MG MS |                | <i>Microcaris sp.</i>                             | Aspirator            | 825       | 8.2     |
| MG4       | MG GA |                | Gastropode                                        | Insulated box        | 825       | 8.4     |
| MG5       | MG SA |                | Sediment A                                        | Tweezers             | 825       | 8.7     |
| MG6       | MG CR |                | Crab                                              | Tweezers             | 825       | 8.2     |
| MG7       | MG BI |                | <i>Bathymordiolum azoricum</i><br>(liquid inside) | Insulated box        | 825       | 8.4     |
| MG8       | MG SB |                | Sediment B                                        | Core                 | 993       | 7.5     |
| MG9       | MG SC |                | Sediment C                                        | Core                 | 869       | 8.3     |
| MG10      | MG SD |                | Sediment                                          | Tweezers             | 808       | 9.1     |
| MG11      | MG CA |                | Chimney A                                         | Tweezers             | 865       | 266.2 * |
| MG12      | MG CB |                | Chimney B                                         | Tweezers             | 865       | 266.2 * |
| MG13      | MG CC |                | Chimney C                                         | Tweezers             | 808       | 266.2 * |
| MH1       | MH WA | Menez Hom      | Water                                             | Aspirator            | 1800      | 4.5     |
| MS1       | MS SA | Mount Saldanha | Sediment A                                        | Tweezers             | 2244      | 3.8     |
| MS2       | MS SB |                | Sediment B                                        | Core                 | 2198      | 3.8     |
| MS3       | MS SC |                | Sediment C                                        | Core                 | 2187      | 3.8     |
| MS4       | MS SD |                | Sediment D                                        | Core                 | 2200      | 3.8     |
| MS5       | MS WA |                | Water                                             | Aspirator            | 2116      | 3.8     |
| MS6       | MS SE |                | Sediment E                                        | Insulated box        | 2198      | 3.9     |
| MS7       | MS SF |                | Sediment F                                        | Insulated box        | 2198      | 3.9     |
| MS8       | MS WH |                | Water (active hole)                               | Insulated box        | 2198      | 3.8     |
| LS1       | LS SD | Lucky Strike   | Sediment                                          | Core                 | 1691      | 4.3     |
| LS2       | LS CA |                | Chimney A (external)                              | Tweezers             | 1728      | 231.3 * |
| LS3       | LS CB |                | Chimney B (internal)                              | Insulated box        | 1728      | 231.3 * |
| LS4       | LS CC |                | Chimney C (internal)                              | Tweezers             | 1728      | 231.3 * |
| LS5       | LS BA |                | <i>Bathymordiolum azoricum</i>                    | Tweezers             | 1693      | 4.4     |
| LS6       | LS WA |                | Water                                             | Insulated box        | 1728      | 4.3     |
| RB1       | RB WA | Rainbow        | Water                                             | Aspirator            | 2295      | 3.7     |
| RB2       | RB CA |                | Chimney A                                         | Insulated box        | 2301      | 333.5 * |
| RB3       | RB CB |                | Chimney B                                         | Tweezers             | 2301      | 333.5 * |
| RB4       | RB CC |                | Chimney C                                         | Tweezers             | 2257      | 333.5 * |
| RB5       | RB RS |                | <i>Rimicaris sp.</i>                              | Aspirator            | 2296      | 3.7     |
| RB6       | RB WC |                | Water (close to chimney)                          | Aspirator            | 2301      | 3.7     |
| RB7       | RB PS |                | <i>Pachicara sp.</i>                              | Aspirator            | 2297      | 3.7     |
| RB8       | RB BA |                | <i>Bathymordiolum azoricum</i>                    | Tweezers             | 2290      | 3.8     |

\* Maximum temperature measured by ROV at the hydrothermal field.

**Figure S1.** Prokaryotes isolation procedure. The isolation procedure includes the processing of the samples, the enrichment for 6 weeks and the isolation and conservation of the marine bacteria collection.

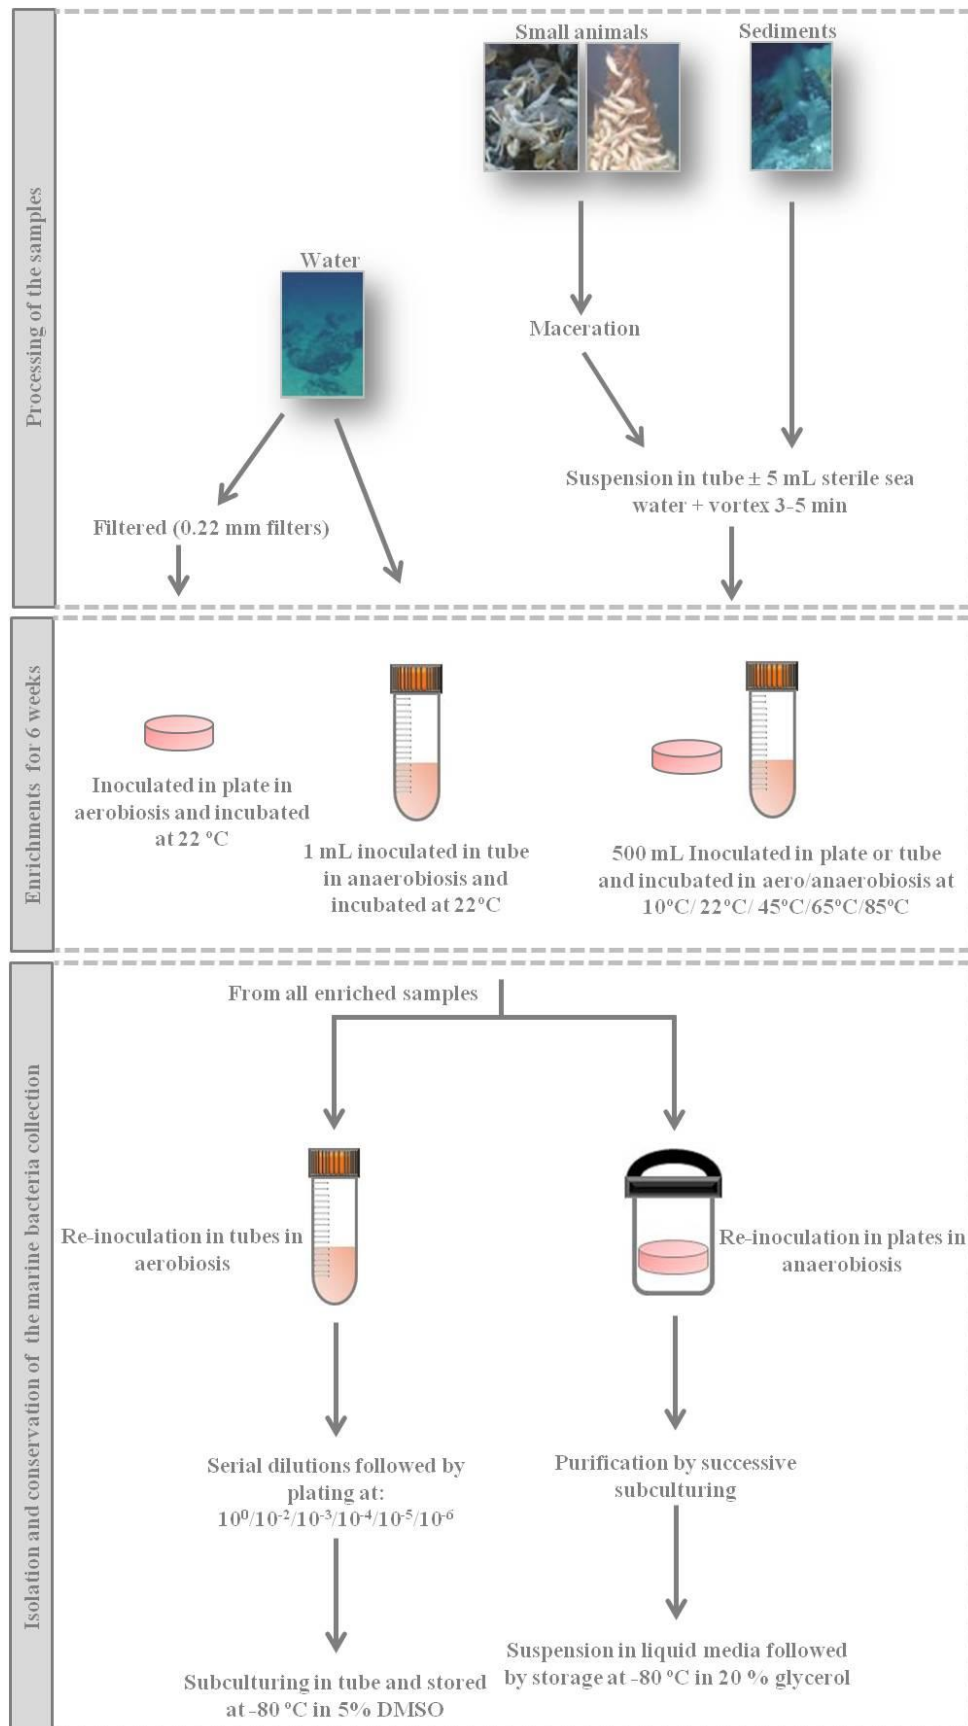

**Table S2.** Composition of media used for the isolation of marine bacteria and of the respective supplements. Two general media (M1 and M2) were used, together with a specific media for the isolation of sulphate-reducing bacteria.

| General Media M1 |            | General Media M2 |             |
|------------------|------------|------------------|-------------|
| BHI              | 0.9% (w/v) | Peptone          | 0.1% (w/v)  |
| PIPES            | 0.6% (w/v) | Cellobiose       | 0.5% (w/v)  |
| Sea salts        | 3.0% (w/v) | Yeast extract    | 0.05% (w/v) |
| Sulfur           | 1.0% (w/v) | PIPES            | 0.6%        |
|                  |            | Sea salts        | 3.0% (w/v)  |
|                  |            | Sulfur           | 1.0% (w/v)  |

Both media were or not supplemented with sodium nitrate (0.17% (w/v)), iron sulphate (0.2% (w/v)) and manganese sulphate (0.085% (w/v)) in order to create M1S and M2S.

| Media for the isolation of sulphate-reducing bacteria |        | Trace elements solution            |        |
|-------------------------------------------------------|--------|------------------------------------|--------|
| Yeast Extract                                         | 0.10%  | Nitilotriacetic acid               | 0.015% |
| Sodium Lactate                                        | 1.25%  | MgSO <sub>4</sub>                  | 0.030% |
| Sodium acetate                                        | 0.14%  | MnSO <sub>4</sub>                  | 0.005% |
| Sea Salts                                             | 3.00%  | NaCl                               | 0.010% |
| PIPES                                                 | 0.60%  | FeSO <sub>4</sub>                  | 0.001% |
| K <sub>2</sub> HPO <sub>4</sub>                       | 0.05%  | CoCl <sub>2</sub>                  | 0.001% |
| Na <sub>2</sub> SO <sub>4</sub>                       | 0.40%  | CaCl <sub>2</sub>                  | 0.001% |
| NH <sub>4</sub> Cl                                    | 0.20%  | ZnSO <sub>4</sub>                  | 0.001% |
| MgSO <sub>4</sub>                                     | 0.20%  | CuSO <sub>4</sub>                  | 0.100% |
| CaCl <sub>2</sub>                                     | 0.02%  | AlK(SO <sub>4</sub> ) <sub>2</sub> | 0.001% |
| FeSO <sub>4</sub>                                     | 0.001% | H <sub>3</sub> BO <sub>3</sub>     | 0.001% |
|                                                       |        | Na <sub>3</sub> MoO <sub>4</sub>   | 0.001% |
|                                                       |        | NiSO <sub>4</sub>                  | 0.003% |
|                                                       |        | Na <sub>2</sub> SeO <sub>3</sub>   | 0.002% |
|                                                       |        | Na <sub>2</sub> WO <sub>4</sub>    | 0.002% |

© 2013 by the authors; licensee MDPI, Basel, Switzerland. This article is an open access article distributed under the terms and conditions of the Creative Commons Attribution license (<http://creativecommons.org/licenses/by/3.0/>).
